# Supplementary material for: The Role of Magnetic Resonance Imaging for the Diagnosis of Atypical Parkinsonism
Source: PubMed Central journal article supplement (PMC7380089; doi:10.3389/fneur.2020.00665), 2020-07-17
Supplement: Table_1.pdf [file Table_1.pdf]

Supplementary table: Patient characteristics in the main studies referenced in Tables 2 and 3

| Study                              | Groups | n   | Gender (M/F) | Mean age $\pm$ SD | Mean disease duration $\pm$ SD |
|------------------------------------|--------|-----|--------------|-------------------|--------------------------------|
| <b>Morphometry, Volumetry</b>      |        |     |              |                   |                                |
| Righini et al. 2004                | PD     | 27  | NA           | 67.6 $\pm$ 3.7    | 5.3 $\pm$ 3.4                  |
|                                    | PSP    | 25  |              | 68.9 $\pm$ 6.5    | 5.3 $\pm$ 2.8                  |
| Quattrone et al. 2008              | HC     | 50  | 25/25        | 65.8 $\pm$ 9.0    | 5.5 $\pm$ 4.3                  |
|                                    | PD     | 108 | 62/46        | 66.6 $\pm$ 6.5    | 3.0 $\pm$ 1.6                  |
|                                    | PSP    | 33  | 23/10        | 69.3 $\pm$ 6.1    | 4.6 $\pm$ 3.1                  |
|                                    | MSA-P  | 19  | 5/14         | 64.0 $\pm$ 5.3    | NA                             |
| Messina et al. 2011                | HC     | 46  | 20/26        | 66.78 $\pm$ 6.7   | 6.19 $\pm$ 4.5                 |
|                                    | PD     | 72  | 40/32        | 63.78 $\pm$ 9.0   | 3.53 $\pm$ 3.5                 |
|                                    | PSP    | 32  | 21/11        | 70.63 $\pm$ 5.3   | 3.07 $\pm$ 2.2                 |
|                                    | MSA-P  | 15  | 5/10         | 64.27 $\pm$ 4.3   | NA                             |
| Huppertz et al. 2016               | HC     | 73  | 37/36        | NA                | NA                             |
|                                    | PD     | 204 | 136/68       | 56.9 $\pm$ 0.9    | 6.5 $\pm$ 0.4                  |
|                                    | PSP-RS | 106 | 60/46        | 66.1 $\pm$ 0.6    | 3.2 $\pm$ 0.2                  |
|                                    | MSA-P  | 60  | 38/22        | 59.2 $\pm$ 1.1    | 3.6 $\pm$ 0.3                  |
|                                    | MSA-C  | 21  | 11/10        | 59.5 $\pm$ 1.8    | 3.8 $\pm$ 0.5                  |
| Scherfler et al. 2016 <sup>1</sup> | PD     | 40  | 6/8          | 61.7 $\pm$ 7.3    | 3.3 $\pm$ 2.2                  |
|                                    | PSP    | 30  | 4/6          | 65.2 $\pm$ 4.9    | 2.7 $\pm$ 1.9                  |
|                                    | MSA    | 40  | 11/3         | 62.7 $\pm$ 7.8    | 2.9 $\pm$ 1.5                  |
| Moller et al. 2017                 | HC     | 73  | 37/36        | 63.3 $\pm$ 0.9    | 6.5 $\pm$ 0.4                  |
|                                    | PD     | 204 | 136/68       | 64.0 $\pm$ 0.8    | 3.2 $\pm$ 0.2                  |
|                                    | PSP    | 106 | 60/46        | 69.0 $\pm$ 0.6    | 3.6 $\pm$ 0.3                  |
|                                    | MSA-P  | 21  | 13/8         | 63.3 $\pm$ 1.0    | 3.8 $\pm$ 0.5                  |
|                                    | MSA-C  | 60  | 30/30        | 63.1 $\pm$ 1.6    | NA                             |
| Mangesius et al. 2018 <sup>1</sup> | PD     | 194 | 36/19        | 64.3 $\pm$ 9.2    | 1.7 $\pm$ 0.6                  |
|                                    | PSP    | 55  | 10/7         | 66.8 $\pm$ 9.6    | 2.1 $\pm$ 0.6                  |
|                                    | MSA    | 63  | 7/5          | 65.5 $\pm$ 7.3    | NA                             |
| Quattrone et al. 2018              | HC     | 53  | 36/17        | 71.5 $\pm$ 5.2    | 6.8 $\pm$ 3.3                  |
|                                    | PD     | 53  | 39/14        | 70.3 $\pm$ 5.2    | 3.9 $\pm$ 1.7                  |
|                                    | PSP-RS | 46  | 25/21        | 70.5 $\pm$ 5.2    | 7.3 $\pm$ 3.7                  |
|                                    | PSP-P  | 32  | 27/7         | 72.0 $\pm$ 5.7    | NA                             |
| Mueller et al. 2018                | HC     | 79  | 42/37        | 67.2 $\pm$ 4.7    | 6.4 $\pm$ 6.2                  |
|                                    | PD     | 289 | 183/106      | 66.2 $\pm$ 8.9    | 2.8 $\pm$ 1.9                  |
|                                    | PSP    | 85  | 50/35        | 68.6 $\pm$ 9.4    | 3.3 $\pm$ 2.4                  |
|                                    | MSA    | 97  | 47/50        | 63.4 $\pm$ 8.2    | NA                             |
| <b>DWI, DTI</b>                    |        |     |              |                   |                                |
| Seppi et al. 2003                  | PD     | 13  | 7/6          | 62 $\pm$ 10.6     | 3.0 $\pm$ 1.2                  |
|                                    | PSP    | 10  | 5/5          | 63 $\pm$ 6.6      | 2.9 $\pm$ 1.1                  |
|                                    | MSA-P  | 12  | 3/9          | 68 $\pm$ 6.9      | 2.7 $\pm$ 1.1                  |
| Schocke et al. 2004                | HC     | 10  | 5/5          | 60 $\pm$ 5.8      | 3.7 $\pm$ 1.8                  |
|                                    | PD     | 17  | 9/8          | 62 $\pm$ 8.0      | 3.9 $\pm$ 1.9                  |
|                                    | MSA-P  | 11  | 3/8          | 64 $\pm$ 5.8      | NA                             |

|                                 |        |     |       |            |          |
|---------------------------------|--------|-----|-------|------------|----------|
| Nicoletti et al. 2006           | HC     | 15  | 5/10  | 67.5 ±6.0  | NA       |
|                                 | PD     | 16  | 9/7   | 61.0 ±7.7  | 7.5 ±5.8 |
|                                 | PSP    | 16  | 13/3  | 70.7 ±7.8  | 3.3 ±2.5 |
|                                 | MSA-P  | 16  | 4/12  | 64.7 ±5.1  | 4.9 ±4.0 |
| Seppi et al. 2006               | HC     | 11  |       | 60 ±5.8    |          |
|                                 | PD     | 20  | NA    | 62 ±8.3    | 3.9 ±5.8 |
|                                 | MSA-P  | 15  |       | 64 ±5.5    | 3.5 ±2.1 |
| Seppi et al. 2006               | PD     | 10  | NA    | 64 ±5.5    | 4 ±2.3   |
|                                 | MSA-P  | 10  |       | 66 ±10.9   | 5 ±2.2   |
| Nicoletti et al. 2008           | HC     | 16  | 4/12  | 66.6 ±5.9  |          |
|                                 | PD     | 15  | 9/6   | 65.2 ±7.8  | 8.6 ±3.6 |
|                                 | PSP    | 28  | 16/12 | 64.5 ±5.6  | 3.2 ±1.7 |
|                                 | MSA-P  | 15  | 6/9   | 64.7 ±5.2  | 5.1 ±4.0 |
| Pellecchia et al. 2009          | HC     | 11  | 7/4   | 58.5 ±12.9 |          |
|                                 | MSA-P  | 9   | 6/3   | 69.3 ±7.3  | 4.1 ±1.4 |
|                                 | MSA-C  | 12  | 7/4   | 58.2 ±5.3  | 4.1 ±2.2 |
| Pellecchia et al. 2011          | MSA    | 11  | 5/6   | 63.6 ±10.1 | 3.4 ±1.1 |
| Tsukamoto et al. 2012           | HC     | 18  |       | 66.3 ±9.9  |          |
|                                 | PD     | 17  | NA    | 71.1 ±6.3  | 6.0 ±3.0 |
|                                 | PSP    | 20  |       | 74.6 ±5.7  | 4.0 ±3.0 |
|                                 | MSA    | 25  |       | 64.7 ±8.2  | 3.4 ±2.6 |
| Nicoletti et al. 2013           | HC     | 10  | 5/5   | 62.2 ±2.8  | 8.3 ±2.5 |
|                                 | PD     | 10  | 6/4   | 64.1 ±3.1  | 5.9 ±1.8 |
|                                 | PSP-RS | 17  | 9/8   | 64.2 ±3.3  | 4.4 ±1.2 |
|                                 | MSA-P  | 9   | 4/5   | 61.3 ±3.2  | 5.4 ±1.1 |
|                                 | MSA-C  | 7   | 3/4   | 62.5 ±2.8  |          |
| Surova et al. 2015 <sup>1</sup> | HC     | 21  | 12/9  | 69         |          |
|                                 | PD     | 10  | 6/4   | 68         | 4        |
|                                 | PSP    | 27  | 14/13 | 68         | 3        |
|                                 | MSA-P  | 11  | 4/7   | 64         | 3        |
| Barbagallo et al. 2016          | PD     | 26  | 12/14 | 63.8 ±6.3  | 7.4 ±4.5 |
|                                 | MSA-P  | 16  | 7/9   | 66.1 ±7.8  | 5.4 ±2.2 |
|                                 | MSA-C  | 13  | 6/7   | 61.5 ±6.5  | 6.1 ±2.5 |
| Bajaj et al. 2017 <sup>2</sup>  | HC     | 60  |       |            |          |
|                                 | PD     | 262 | NA    | NA         | NA       |
|                                 | MSA-P  | 127 |       |            |          |
| <b>Relaxometry, QSM</b>         |        |     |       |            |          |
| Lee et al. 2013                 | HC     | 21  | 12/9  | 60.0 ±6.1  | NA       |
|                                 | PD     | 29  | 17/12 | 59.1 ±7.6  | 2.5 ±1.9 |
|                                 | PSP    | 13  | 8/5   | 57.9 ±8.5  | 1.9 ±0.7 |
|                                 | MSA-P  | 15  | 4/11  | 62.0 ±5.2  | 2.3 ±1.3 |
| Sjöstrom et al. 2017            | HC     | 14  | 9/5   | 63.5 ± 5.3 | NA       |
|                                 | PD     | 62  | 43/19 | 65.2 ±10.5 | 4.7 ±4.4 |
|                                 | PSP    | 15  | 12/3  | 69.1 ± 6.0 | 2.8 ±1.0 |
|                                 | MSA    | 11  | 6/5   | 68.9 ±13.1 | 3.6 ±2.7 |
| <b>Other</b>                    |        |     |       |            |          |
| Kataoka et al. 2019             | PSP    | 51  | 35/16 | 72.2 ±6.2  | 3.5 ±2.0 |

<sup>1</sup> Patient characteristics in the test cohort

<sup>2</sup> Metanalysis

Abbreviations: DWI, diffusion-weighted imaging; DTI, diffusion tensor imaging; HC, healthy controls; MSA, multiple system atrophy; MSA-C, cerebellar variant of MSA; MSA-P, parkinsonian variant of MSA; PD, Parkinson's disease; PSP, progressive supranuclear palsy
